# Supplementary material
Source: PubMed Central journal article supplement (PMC5688950)
Supplement: NIHMS873345-supplement-Sup_Files.pdf [file NIHMS873345-supplement-Sup_Files.pdf]

## Supplementary Information

### **Total RNA-Seq to identify pharmacological effects on specific stages of mRNA synthesis**

Sarah A. Boswell<sup>1,2</sup>, Andrew Snavely<sup>3</sup>, Heather M. Landry<sup>3</sup>, L. Stirling Churchman<sup>3</sup>, Jesse M. Gray<sup>3\*</sup>, and Michael Springer<sup>1,2\*</sup>

---

[1] Department of Systems Biology, Harvard Medical School, Boston MA

[2] Laboratory of Systems Pharmacology, Harvard Medical School, Boston MA

[3] Department of Genetics, Harvard Medical School, Boston MA

\* Contributed equally and corresponding authors [gray@genetics.med.harvard.edu](mailto:gray@genetics.med.harvard.edu) and [michael.springer@hms.harvard.edu](mailto:michael.springer@hms.harvard.edu)

## **Supplementary Results**

**Supplementary Table 1.** GEO submission metadata.

## **Supplementary Figures**

**Supplementary Figure 1.** Total RNA-Seq profiles for IsoG, DRB, FP, Meayamycin (MY), SSA, and siRNA targeting RRP40.

**Supplementary Figure 2.** Definition of metrics used to classify small molecule action on transcription and splicing.

**Supplementary Figure 3.** Meayamycin inhibits splicing, and effects of IsoG on the RNA polymerase CTD are reversible.

**Supplementary Figure 4.** NET-Seq reads around polyadenylation sites recapitulate the termination defect in IsoG treated cells first observed by RNA-Seq.

**Supplementary Figure 5.** Sensitivity of metrics to downsampling of RNA-Seq read depth.

## **Supplementary Reference:**

55. Kaida, D. et al. Spliceostatin A targets SF3b and inhibits both splicing and nuclear retention of pre-mRNA. *Nat. Chem. Biol.* 3, 576–583 (2007).

**Supplementary Table 1. GEO submission metadata.** Table of all the experiments and samples for this paper as submitted to GEO.

| file name                                            | instrument model    | read length | single or paired-end | raw read counts |
|------------------------------------------------------|---------------------|-------------|----------------------|-----------------|
| HiSeq_IsoG-CPT__D6-26_CPT__UNMAPPED-NOPAIRS__50bp.fq | Illumina HiSeq 2000 | 50          | single               | 29886918        |
| HiSeq_IsoG-CPT__D6-26_IsG__UNMAPPED-NOPAIRS__50bp.fq | Illumina HiSeq 2000 | 50          | single               | 46022294        |
| HiSeq_IsoG-CPT__D6-26_c10__UNMAPPED-NOPAIRS__50bp.fq | Illumina HiSeq 2000 | 50          | single               | 37818611        |
| HiSeq_IsoG-CPT__D6-26_c60__UNMAPPED-NOPAIRS__50bp.fq | Illumina HiSeq 2000 | 50          | single               | 34972053        |
| HiSeq_IsoG-CPT__D7-10_CPT__UNMAPPED-NOPAIRS__50bp.fq | Illumina HiSeq 2000 | 50          | single               | 34080550        |
| HiSeq_IsoG-CPT__D7-10_c10__UNMAPPED-NOPAIRS__50bp.fq | Illumina HiSeq 2000 | 50          | single               | 31323474        |
| HiSeq_IsoG-CPT__D8-01_IsG__UNMAPPED-NOPAIRS__50bp.fq | Illumina HiSeq 2000 | 50          | single               | 39106256        |
| HiSeq_IsoG-CPT__D8-01_c60__UNMAPPED-NOPAIRS__50bp.fq | Illumina HiSeq 2000 | 50          | single               | 35467531        |
| HiSeq_IsoG-CPT__D9-19_IsG__UNMAPPED-NOPAIRS__50bp.fq | Illumina HiSeq 2000 | 50          | single               | 41004036        |
| HiSeq_IsoG-CPT__D9-19_c60__UNMAPPED-NOPAIRS__50bp.fq | Illumina HiSeq 2000 | 50          | single               | 32706937        |
| C_polyA_1.fastq                                      | Illumina HiSeq 2000 | 50          | single               | 16044027        |
| C_polyA_2.fastq                                      | Illumina HiSeq 2000 | 50          | single               | 19003387        |
| C_total_1.fastq                                      | Illumina HiSeq 2000 | 50          | single               | 10322814        |
| C_total_2.fastq                                      | Illumina HiSeq 2000 | 50          | single               | 14668030        |
| DRB_polyA_1.fastq                                    | Illumina HiSeq 2000 | 50          | single               | 14339784        |
| DRB_polyA_2.fastq                                    | Illumina HiSeq 2000 | 50          | single               | 16616184        |
| DRB_total_1.fastq                                    | Illumina HiSeq 2000 | 50          | single               | 19846938        |
| DRB_total_2.fastq                                    | Illumina HiSeq 2000 | 50          | single               | 11039001        |
| IsoG_polyA_1.fastq                                   | Illumina HiSeq 2000 | 50          | single               | 15697483        |
| IsoG_polyA_2.fastq                                   | Illumina HiSeq 2000 | 50          | single               | 22254735        |
| IsoG_total_1.fastq                                   | Illumina HiSeq 2000 | 50          | single               | 19222840        |
| IsoG_total_2.fastq                                   | Illumina HiSeq 2000 | 50          | single               | 14355621        |
| C_18hr_B1__AS05_ACAGTG.R1.fastq                      | Illumina HiSeq 2000 | 50          | single               | 11267263        |
| C_18hr_B2__AS06_TAGCTT.R1.fastq                      | Illumina HiSeq 2000 | 50          | single               | 9006933         |
| C_6hr_B1__AS01_TTAGGC.R1.fastq                       | Illumina HiSeq 2000 | 50          | single               | 5608642         |
| C_6hr_B2__AS02_CAGATC.R1.fastq                       | Illumina HiSeq 2000 | 50          | single               | 1445249         |
| MY_18hr_B1__AS07_GCCAAT.R1.fastq                     | Illumina HiSeq 2000 | 50          | single               | 11814071        |
| MY_18hr_B2__AS08_GGCTAC.R1.fastq                     | Illumina HiSeq 2000 | 50          | single               | 25596331        |
| MY_6hr_B1__AS03_TGACCA.R1.fastq                      | Illumina HiSeq 2000 | 50          | single               | 9638975         |
| MY_6hr_B2__AS04_ACTTGA.R1.fastq                      | Illumina HiSeq 2000 | 50          | single               | 6657706         |
| C_total_18h_B1.fq                                    | Illumina HiSeq 2000 | 50          | single               | 9120119         |
| C_total_18h_B2.fq                                    | Illumina HiSeq 2000 | 50          | single               | 10040863        |
| C_total_6h_B1.fq                                     | Illumina HiSeq 2000 | 50          | single               | 10447786        |
| C_total_6h_B2.fq                                     | Illumina HiSeq 2000 | 50          | single               | 8571269         |
| Drb_total_18h_B1.fq                                  | Illumina HiSeq 2000 | 50          | single               | 9601847         |
| Drb_total_18h_B2.fq                                  | Illumina HiSeq 2000 | 50          | single               | 10508965        |
| Drb_total_6h_B1.fq                                   | Illumina HiSeq 2000 | 50          | single               | 10481620        |
| Drb_total_6h_B2.fq                                   | Illumina HiSeq 2000 | 50          | single               | 9519695         |
| Flav_total_18h_B1.fq                                 | Illumina HiSeq 2000 | 50          | single               | 10272661        |
| Flav_total_18h_B2.fq                                 | Illumina HiSeq 2000 | 50          | single               | 8786717         |
| Flav_total_6h_B1.fq                                  | Illumina HiSeq 2000 | 50          | single               | 10904424        |
| Flav_total_6h_B2.fq                                  | Illumina HiSeq 2000 | 50          | single               | 7865542         |
| IsoG_total_18h_B1.fq                                 | Illumina HiSeq 2000 | 50          | single               | 6005841         |
| IsoG_total_18h_B2.fq                                 | Illumina HiSeq 2000 | 50          | single               | 8970784         |
| IsoG_total_6h_B1.fq                                  | Illumina HiSeq 2000 | 50          | single               | 10278058        |
| IsoG_total_6h_B2.fq                                  | Illumina HiSeq 2000 | 50          | single               | 9025001         |
| DMSO_Rep1_160623.fastq                               | Illumina NEXTSeq    | 75          | single               | 98229966        |
| DMSO_Rep2.fastq                                      | Illumina NEXTSeq    | 75          | single               | 205709503       |
| IsoG_Rep1.fastq                                      | Illumina NEXTSeq    | 75          | single               | 261046299       |
| IsoG_Rep2_160623.fastq                               | Illumina NEXTSeq    | 75          | single               | 108051980       |

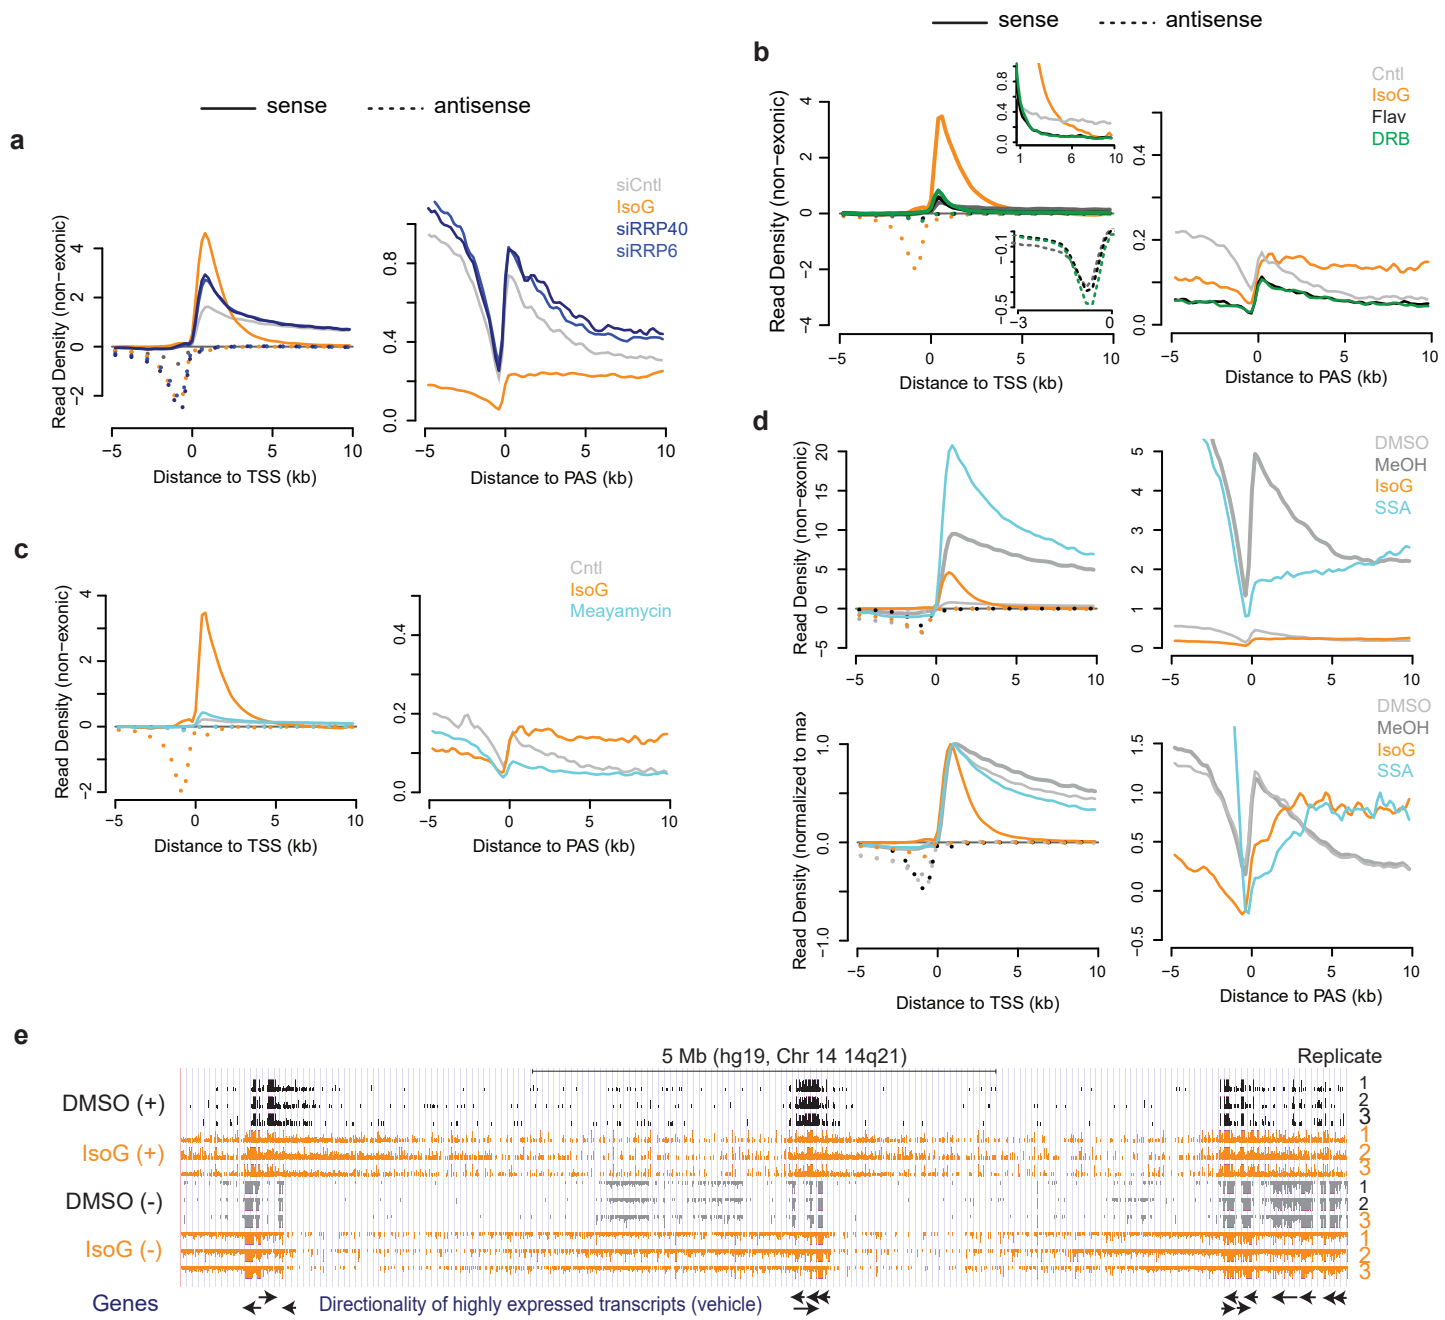

**Supplementary Figure 1. Total RNA-Seq profiles for IsoG, DRB, FP, Meayamycin (MY), SSA, and siRNA targeting RRP40.** (a-c) Non peak-normalized metaplots corresponding to the peak-normalized metaplots in Fig. 2. Whereas the Fig. 2 plots are designed to show promoter-proximal versus promoter-distal RNA abundance, these plots are normalized to ERCC spike in controls to show absolute abundance. Insets are zoomed in to show that in IsoG-treated cells read density drops below that of vehicle-treated cells by ~6 kb downstream of TSSs (top) and that peak antisense read densities are similar among Flav, DRB, and control. In these and all other ERCC normalized TSS metaplots, the background level of transcription as measured in the -5 to -10 kb region upstream of the plotted TSSs is subtracted (Online Methods). (d) Comparison of IsoG with the splicing inhibitor Spliceostatin A (SSA) (processed identically to similar plots in Fig 2). Top panel is the non peak-normalized data as in (a-c); bottom panel is the peak-normalized data. Both IsoG and SSA data in (d) were from Tseng et al<sup>21</sup>. (e) Representative example locus showing that IsoG causes pervasive transcription beyond and through gene boundaries. HeLa cells were treated for 18h with 30 uM IsoG in (e). Arrows at bottom show the annotated directionality of transcripts expressed highly in the vehicle-treated cells.

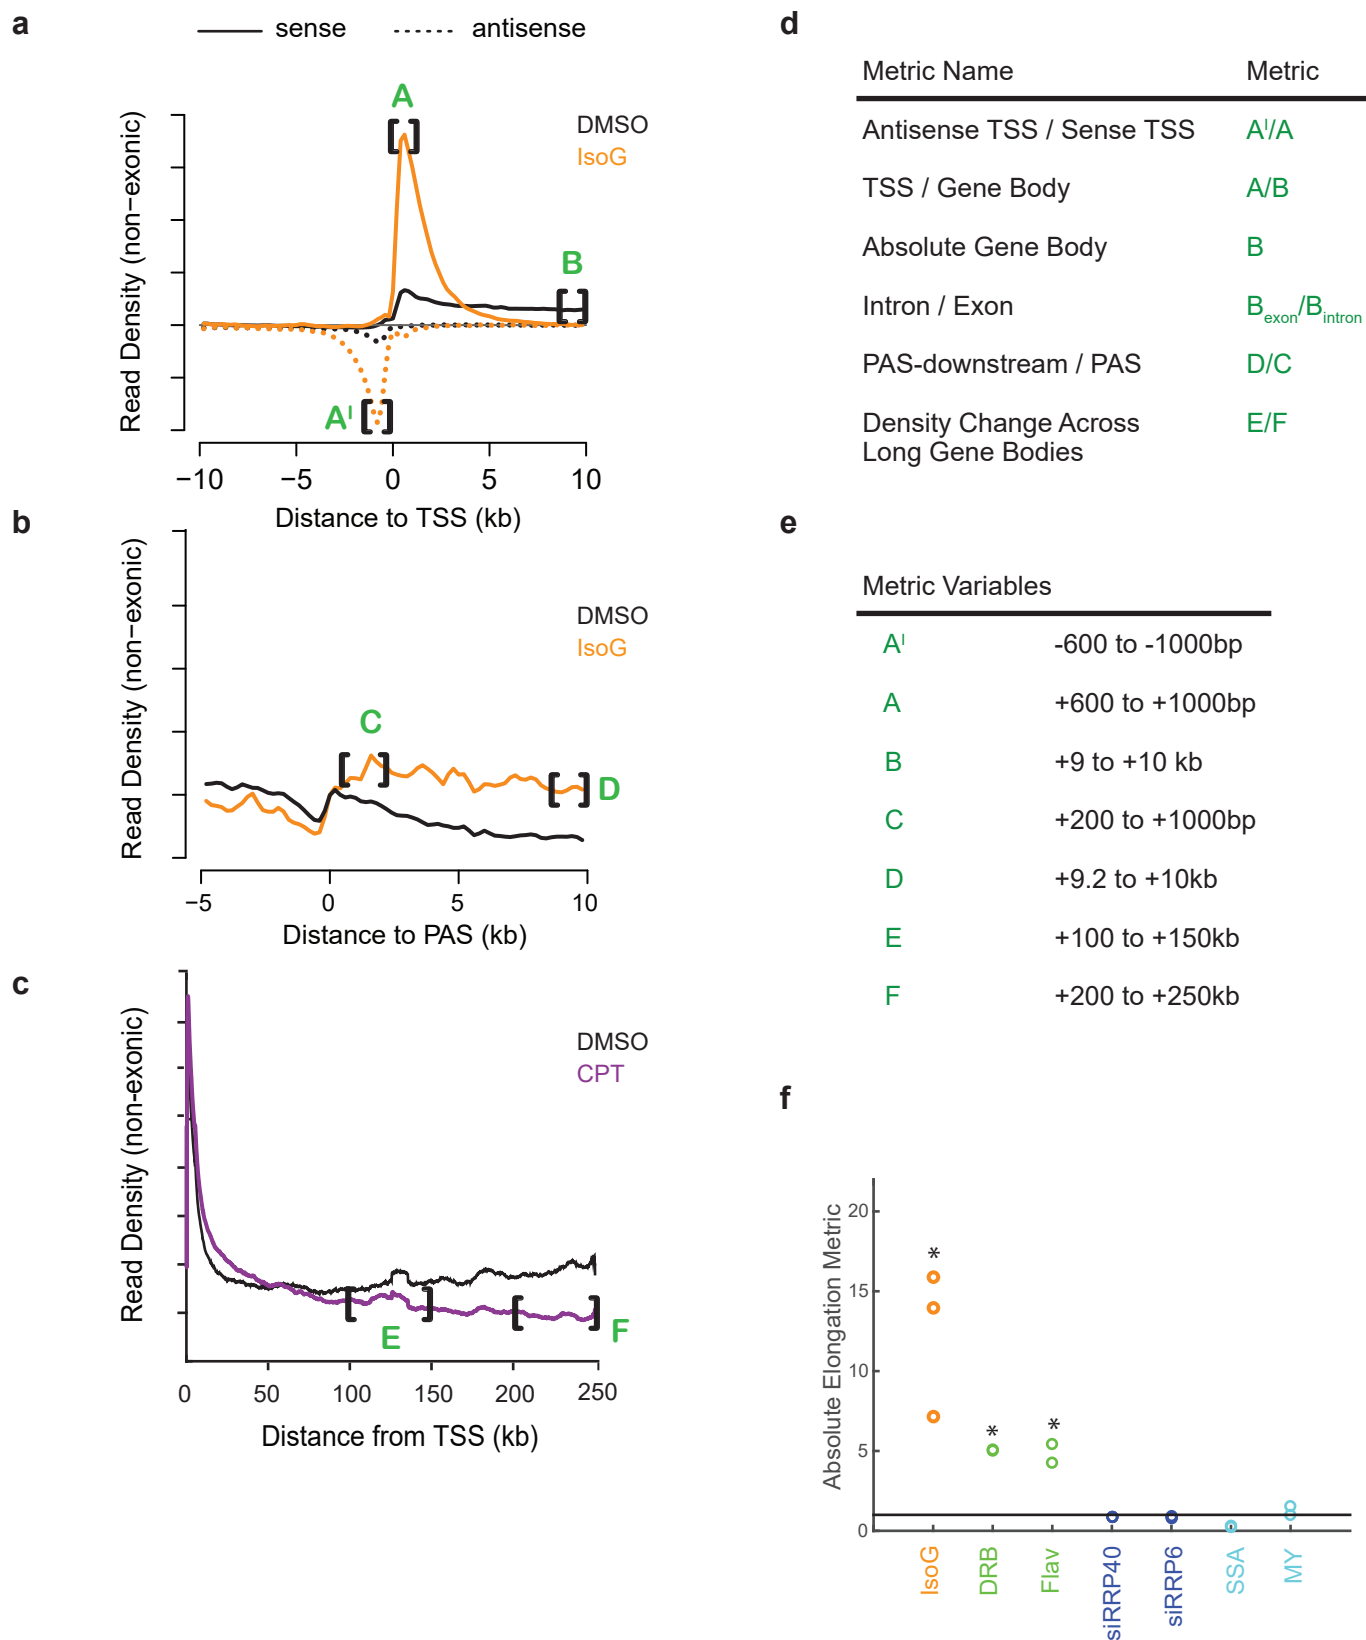

**Supplementary Figure 2. Definition of metrics used to classify small molecule action on transcription and splicing.** (a) At top, TSS metaplots annotated to show regions used for exosome, promoter-proximal elongation and splicing metric calculations. (b) PAS metaplots annotated to show regions used for the termination metric calculation. (c) TSS metaplots annotated to show regions used for the gene body elongation defect metric calculation. TSS metaplots were made here as described in Online Methods. (d) Table showing the formulas used to compute each metric. (e) Table showing the regions of the metaplots used for each variable in the formulas shown in (d). (f) Absolute gene body metric, a measure of decreased elongation based on the ERCC spike-in-normalized non-exonic RNA-Seq signal from +9 to +10 kb relative to the TSS. Plotted values represent vehicle controls divided by matched drug treatments, such that positive values represent decreased RNA-Seq signal upon drug treatment. NOTE: this metric will also vary based on rates of splicing and transcription initiation. Samples and treatments are the same as in Fig. 2. Stars indicate significant increases ( $p < 0.05$ ) based on a one-tailed  $t$ -test with Bonferonni correction.

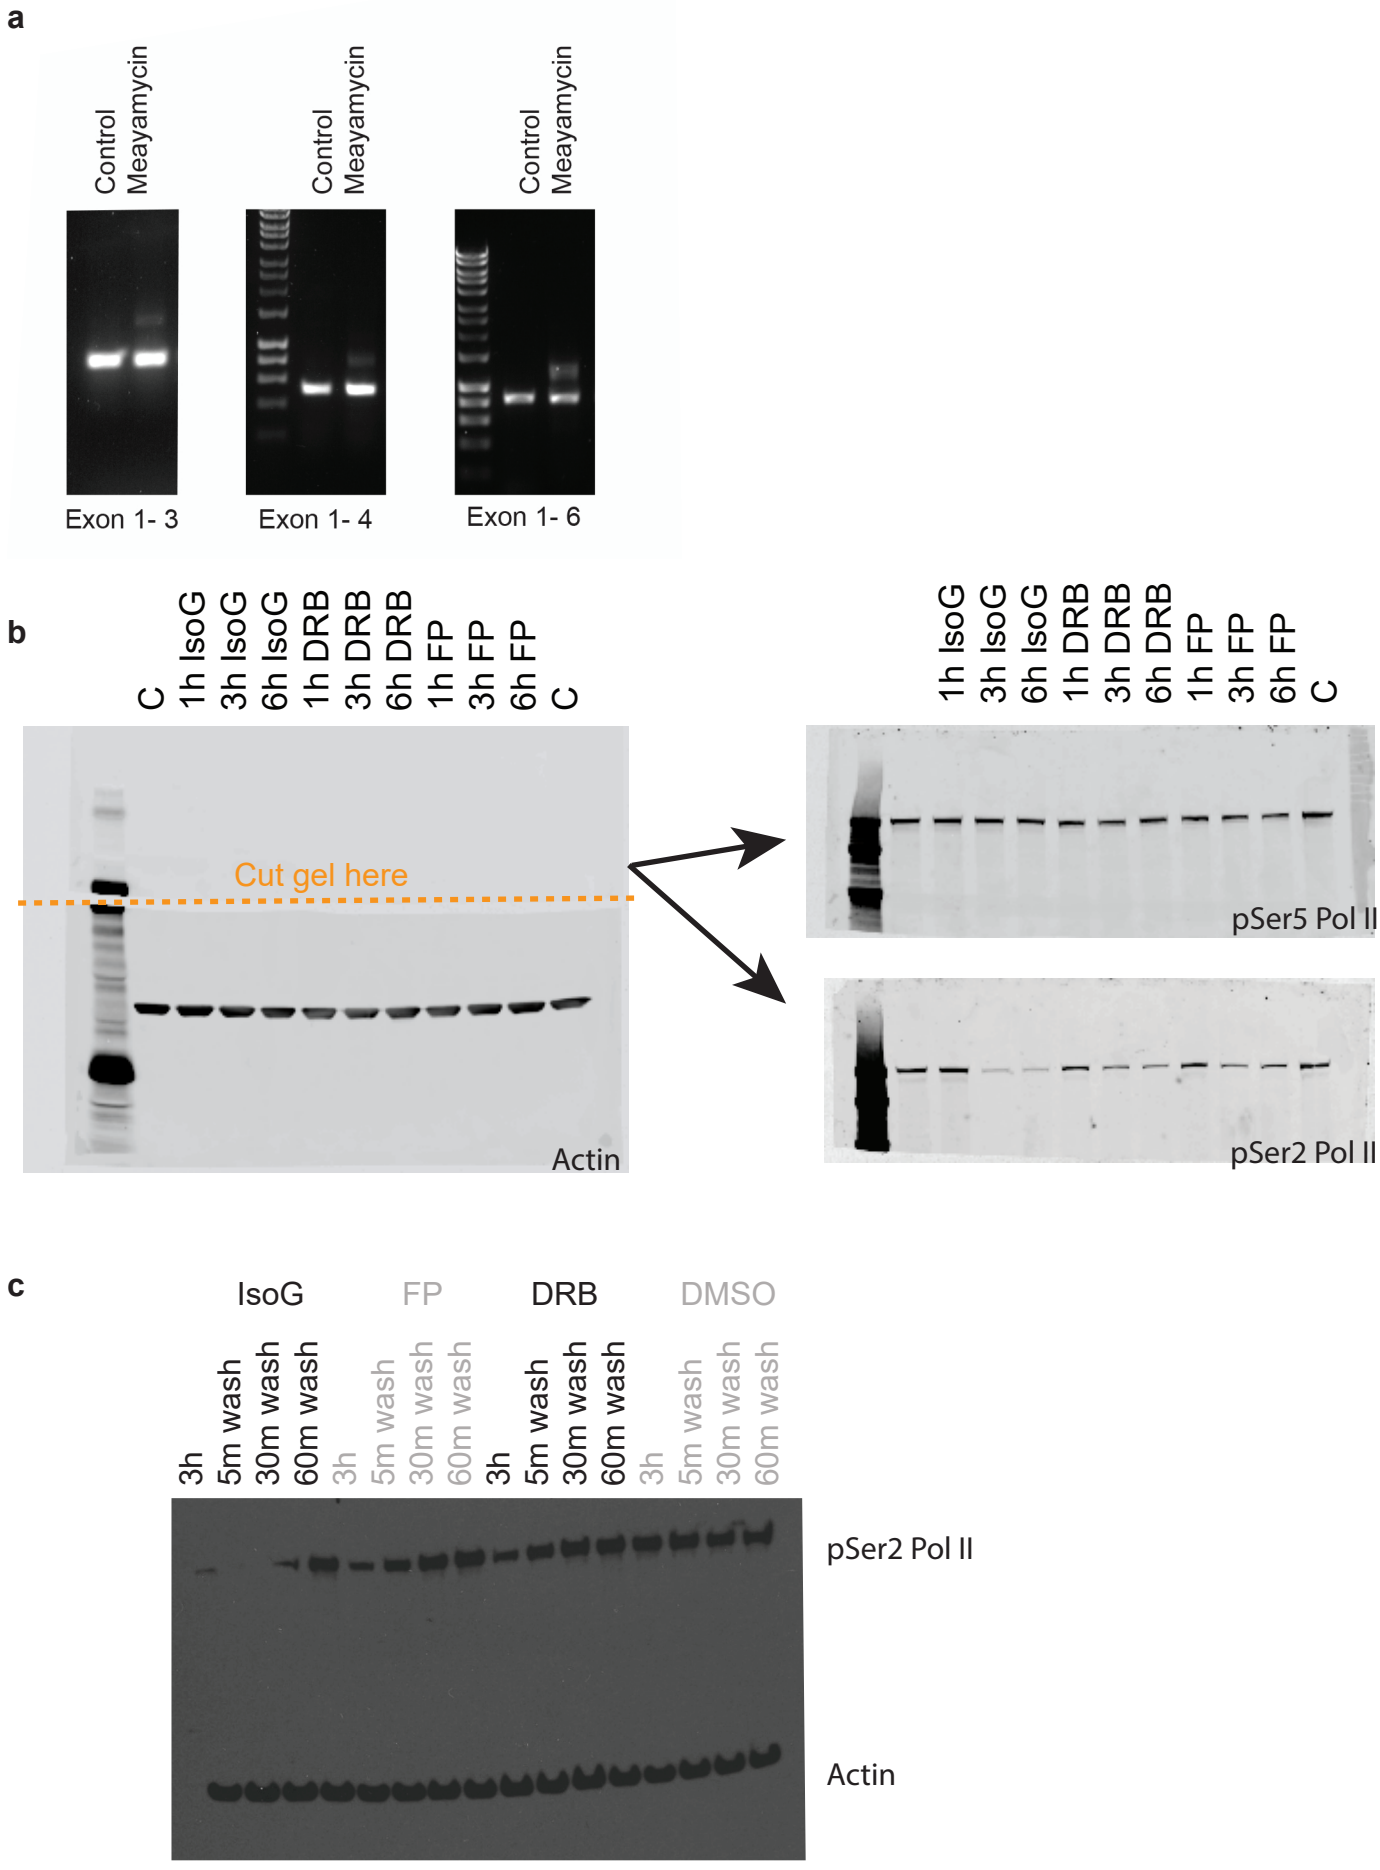



**Supplementary Figure 3. Meayamycin inhibits splicing, and effects of IsoG on the RNA polymerase CTD are reversible.** (a) Accumulation of unspliced introns in the IκB gene after 6 hours of Meayamycin (MY) treatment, as detected by PCR using previously validated primers<sup>55</sup>. (b) Full gel images from western blots in Fig. 4a with a dashed line marking where the gel was cut for probing with different antibodies. (c) Serine 2 phosphorylation on the CTD recovers after washout of IsoG, DRB, or flavopiridol (FP). Cells in (c) were treated with 30uM IsoG, 100uM DRB, or 300nM FP for 3 hours and washed out for 5–60 minutes as indicated above each lane of the gel.

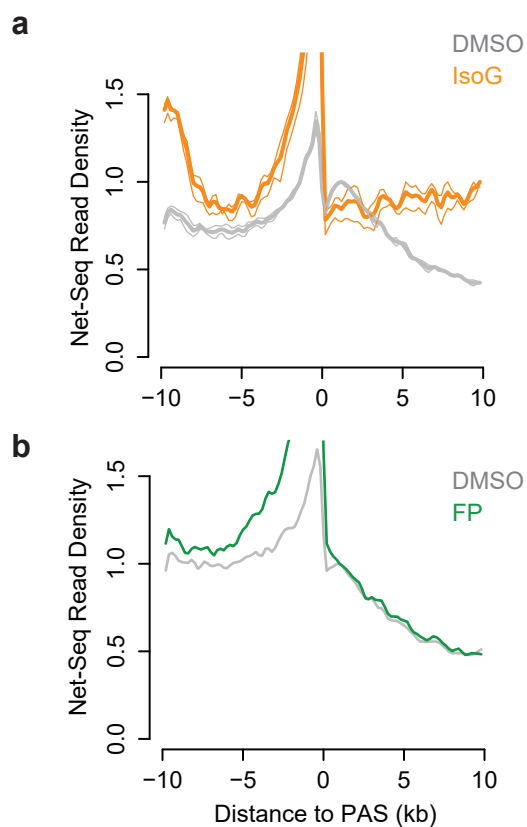

**Supplementary Figure 4. NET-Seq reads around polyadenylation sites recapitulate the termination defect in IsoG treated cells first observed by RNA-Seq.** Metagene analysis of NET-Seq data from HeLa S3 cells aligned at polyadenylation sites (PASs) and normalized to peak expression downstream of the PAS. **(a)** Cells treated with IsoG for 6 hours at 30uM; the solid line is the average of two replicates and the lighter lines are the replicate data sets. **(b)** Cells treated with flavopiridol (FP) for 1 hour as previously published<sup>36</sup>.

DMSO IsoG SSA siRRP40

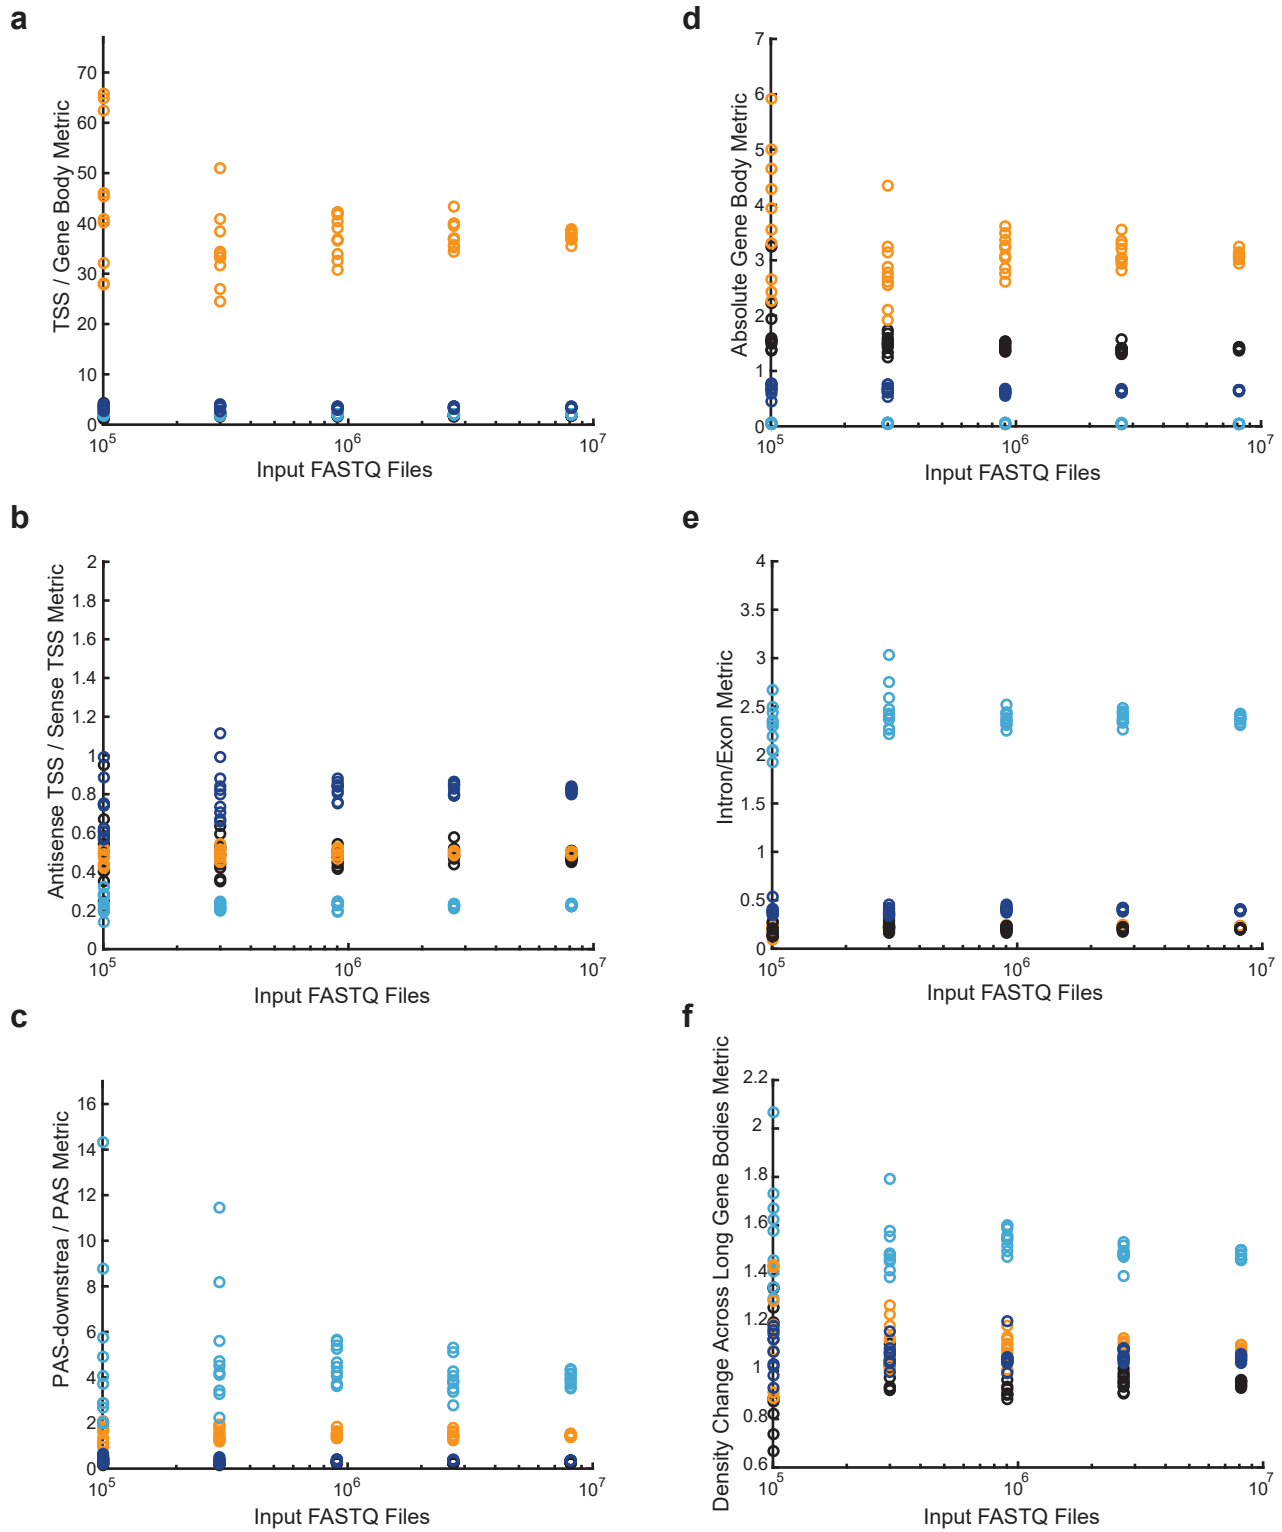

**Supplementary Figure 5. Sensitivity of metrics to downsampling of RNA-Seq read depth.**

To estimate the relationship between read depth and the accuracy of our metrics, we downsampled four of our experimental samples (DMSO, IsoG, SSA, and siRRP40).

Downsampling was performed by randomly choosing sequencing reads without replacement from the initial fastq file to create a new fastq file. The resulting fastq file was processed in a manner identical to that of the original sample. Each sample was down sampled ten times at five different downsampling depths ( $10^5$ ,  $3 \times 10^5$ ,  $9 \times 10^5$ ,  $2.7 \times 10^6$ , and  $8.1 \times 10^6$ ). **(a-f)** For each downsampling depth, the metrics described in Supplementary Fig. 2a-e and Online Methods were computed.
